# Supplementary material for: Photoinduced post-modification of graphitic carbon nitride-embedded hydrogels: synthesis of 'hydrophobic hydrogels' and pore substructuring
Source: publisher site journal article supplement (doi:10.3762/bjoc.17.92), 2021-05-21
Supplement: Additional file 1 [file 1860-5397-17-92-S1.pdf]

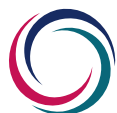

## Supporting Information

for

### **Photoinduced post-modification of graphitic carbon nitride-embedded hydrogels: synthesis of 'hydrophobic hydrogels' and pore substructuring**

Cansu Esen and Baris Kumru

*Beilstein J. Org. Chem.* **2021**, *17*, 1323–1334. [doi:10.3762/bjoc.17.92](https://doi.org/10.3762/bjoc.17.92)

## Four supporting figures

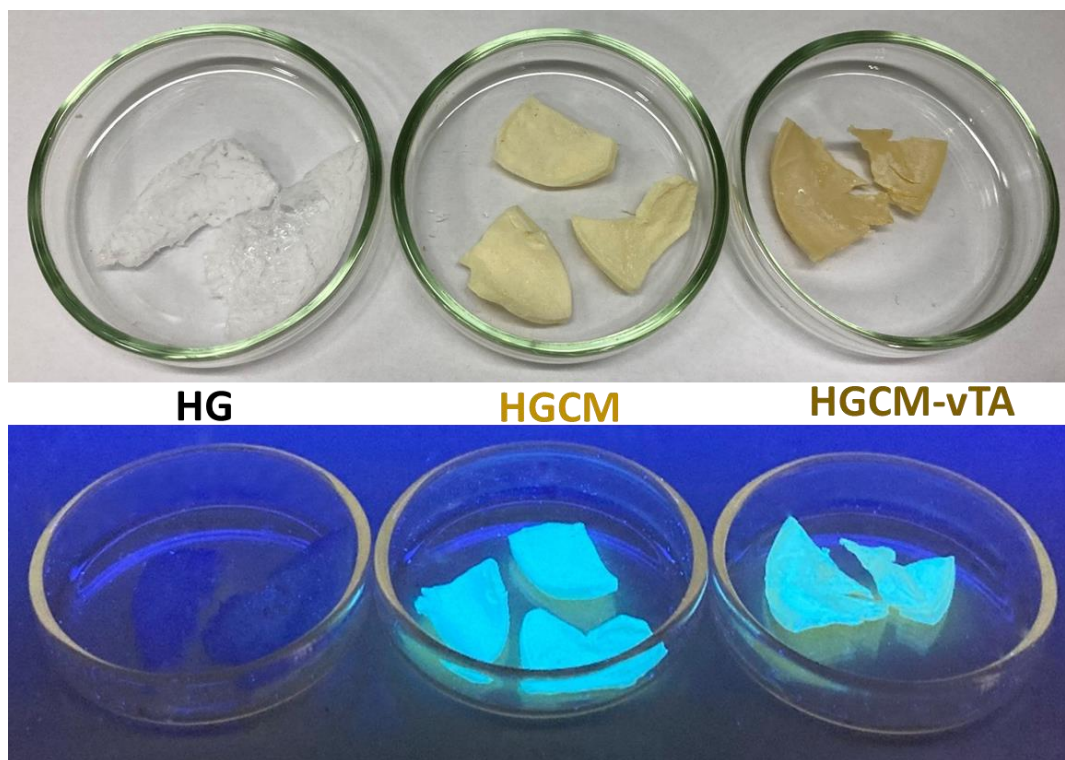

**Figure S1:** Digital images of HG, HGCM and HGCM-vTA under daylight and UV light illumination.

HGC-vTA

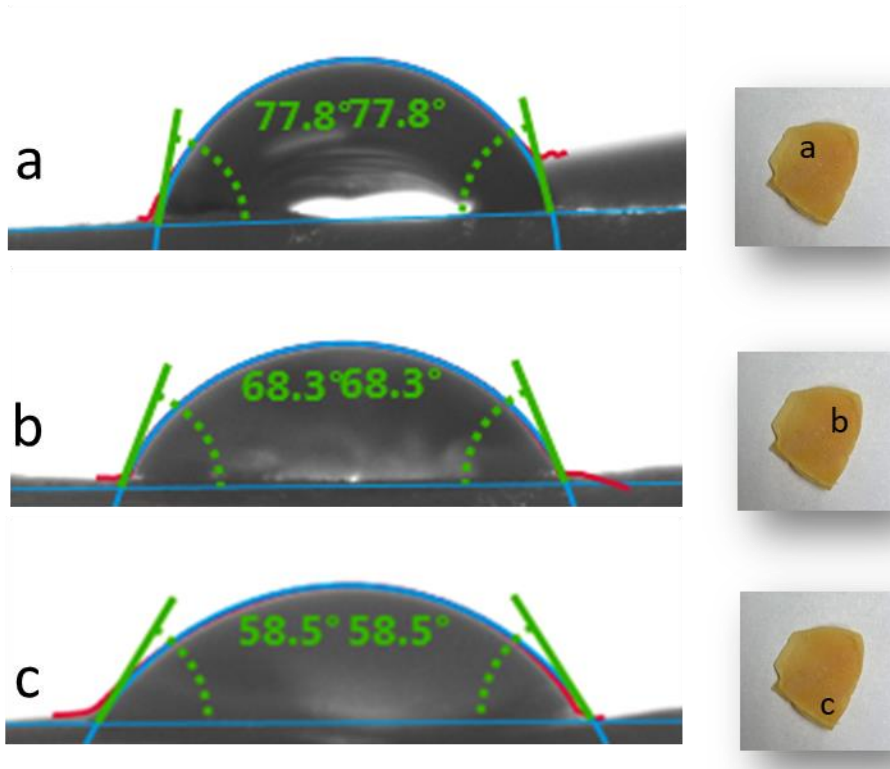

**Figure S2:** Water contact angle results of HGCM-vTA on multiple contact points (obtained after 15 seconds of equilibrium).

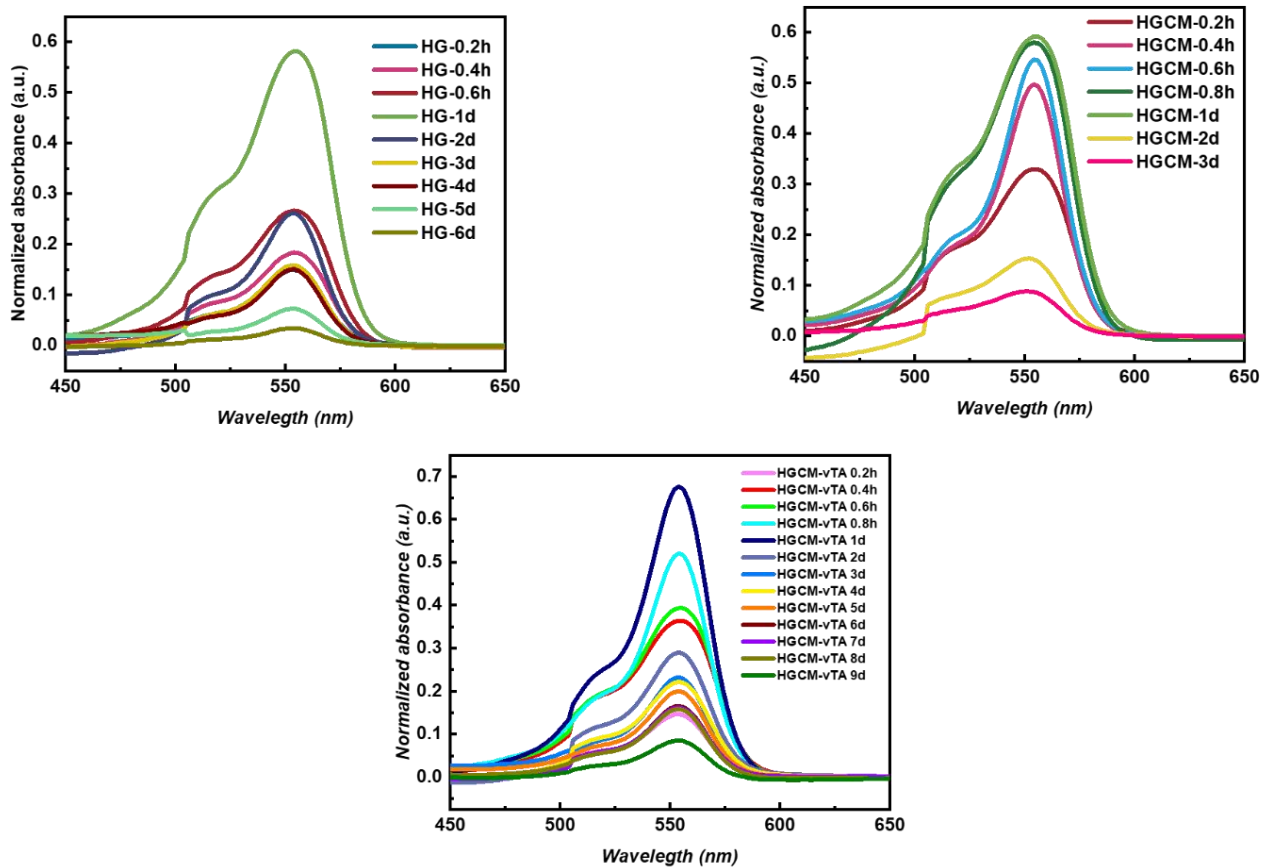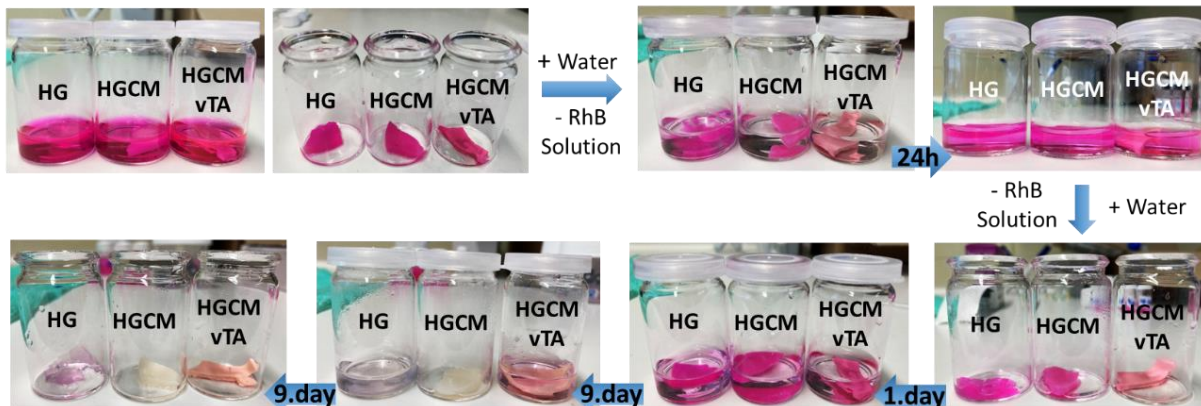

**Figure S3:** RhB dye releasing progress of HG, HGCM and HGCM-vTA at specified time intervals followed by UV-vis spectroscopy.

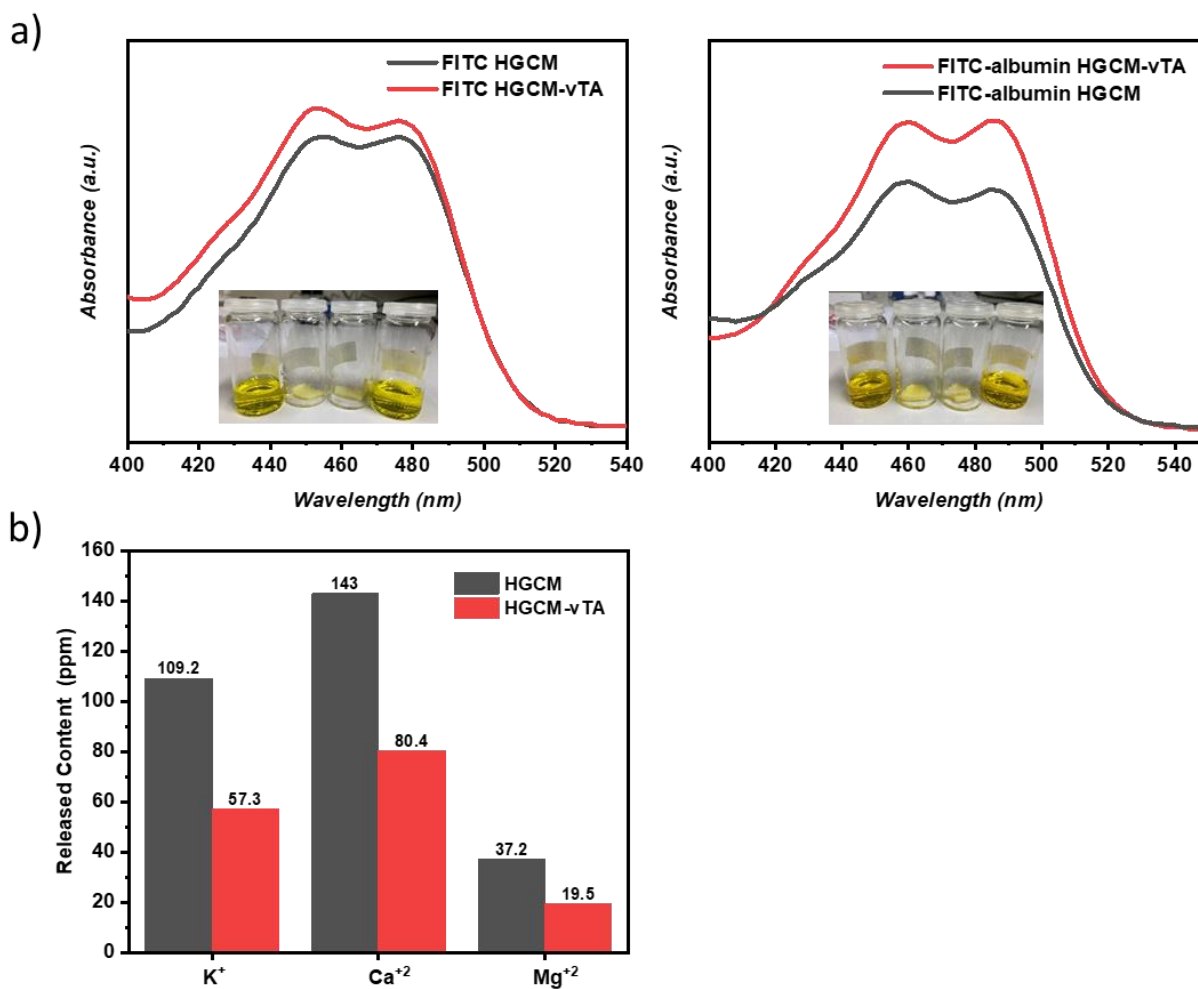

**Figure S4:** a) FITC-dextran and FITC-albumin releasing progress (after 24 hours) of HGCM and HGCM-vTA monitored by UV-vis spectroscopy. b) Inductively coupled plasma optical emission spectroscopy (ICP-OES) results of released K<sup>+</sup>, Ca<sup>2+</sup> and Mg<sup>2+</sup> content for HGCM and HGCM-vTA.
